# Supplementary material for: Flipped-classroom training in advanced cardiopulmonary life support
Source: PLoS One. 2018 Sep 5;13(9):e0203114. doi: 10.1371/journal.pone.0203114 (PMC6124753; doi:10.1371/journal.pone.0203114)
Supplement: S1 File — (XLSX) [file pone.0203114.s001.xlsx]

## Sheet: Sheet1
Group	Team	ID	Sch	SEX	AGE	Flipped	scenario	Q1	Q2	Q3	Q4	Q5	Q6	Q7	Q8	Q9	Q10	Q11	Q12	Q13	Q1~Q13 SUM	Q14	Q1~Q14 SUM	Total point	ACLS	ATLS	OSCE	CPX	final_Score	R1	R2	R3	R4	R5	R6	R7	R8	sum
2	3	2014580002	1	1	29	1	2	1	0	1	1	0	1			1	1	1	0	1	8	4	12	16	75	83.7838	100	65	81.0382	8	7	7	6	8	7	8	8	59
2	4	2014580005	1	2	30	1	1	1	1	1	1	0	1	1	1	1	1	1	0	0	10	4	14	18	77.8	86.4865	88.6364	60	78.3669	10	10	10	10	10	10	10	10	80
2	4	2014580006	1	2	28	1	1	1	1	1	1	0	1	1	1	1	1	1	0	0	10	4	14	18	77.8	86.4865	93.1818	60	79.276	8	8	8	8	8	7	8	8	63
2	4	2012191051	2	2	25	1	1	1	1	1	1	0	1	1	1	1	1	1	0	0	10	4	14	18	77.8	86.4865	93.1818	65	81.276	10	9	9	8	9	10	9	8	72
2	1	2012191009	2	1	25	1	2	1	0	1	1	0	1			1	1	1	0	0	7	4	11	16	68.8	75.6757	97.7273	60	77.485	9	7	6	8	8	6	4	5	53
2	1	2012191034	2	1	23	1	2	1	0	1	1	0	1			1	1	1	0	0	7	4	11	16	68.8	75.6757	79.021	75	77.7438	9	9	9	8	9	9	9	9	71
2	2	2012191075	2	1	27	1	1	1	0	1	1	0	1	1	1	1	1	1	0	0	9	4	13	18	72.2	67.5676	79.021	65	74.7727	10	8	9	8	8	8	9	10	70
2	2	2014580023	1	2	28	1	1	1	0	1	1	0	1	1	1	1	1	1	0	0	9	4	13	18	72.2	67.5676	76.9231	65	74.3531	10	10	10	10	10	10	10	10	80
2	1	2014580026	1	2	27	1	2	1	0	1	1	0	1			1	1	1	0	0	7	4	11	16	68.8	75.6757	90.3846	60	75.0165	10	10	10	10	10	10	10	10	80
2	3	2014580029	1	1	26	1	2	1	0	1	1	0	1			1	1	1	0	1	8	4	12	16	75	83.7838	82.8671	60	76.1116	10	10	9	10	10	10	10	10	79
2	2	2012191039	2	1	24	1	1	1	0	1	1	0	1	1	1	1	1	1	0	0	9	4	13	18	72.2	67.5676	91.6084	65	75.7901	9	9	8	8	9	9	8	8	68
2	4	2012191060	2	1	24	1	1	1	1	1	1	0	1	1	1	1	1	1	0	0	10	4	14	18	77.8	86.4865	75.6993	65	76.7795	10	10	10	10	10	9	10	10	79
2	1	2014580046	1	2	30	1	2	1	0	1	1	0	1			1	1	1	0	0	7	4	11	16	68.8	75.6757	84.7902	70	77.3976	10	10	10	10	10	10	10	10	80
2	3	2012191058	2	1	26	1	2	1	0	1	1	0	1			1	1	1	0	1	8	4	12	16	75	83.7838	74.4755	65	74.9333	8	7	8	9	10	8	7	8	65
3	1	2012191031	2	2	25	2	1	1	1	1	1	0	1	1	1	1	1	0	1	1	11	4	15	18	83.3	83.7838	96.875	70	82.9426	10	10	9	10	10	10	10	10	79
3	1	2012191055	2	2	32	2	1	1	1	1	1	0	1	1	1	1	1	0	1	1	11	4	15	18	83.3	83.7838	90.625	65	80.6926	8	8	8	10	10	8	8	8	68
3	1	2014580001	1	2	26	2	1	1	1	1	1	0	1	1	1	1	1	0	1	1	11	4	15	18	83.3	83.7838	90.625	60	79.6926	7	7	7	7	8	8	9	8	61
3	2	2014580014	1	1	26	2	2	1	1	1	1	0	0			1	1	1	1	0	8	4	12	16	75	78.3784	86.0795	75	80.0609	10	9	9	9	9	10	10	10	76
3	4	2014580015	1	1	27	2	1	1	1	1	1	0	1	1	1	1	1	1	1	1	12	4	16	18	88.8889	78.3784	69.8864	70	77.0674	9	8	9	8	9	9	10	10	72
3	3	2012191040	2	1	26	2	2	1	1	1	1	0	0			1	1	0	0	0	6	3	9	16	56.3	72.973	83.8068	60	72.1485	8	8	8	9	9	8	8	8	66
3	4	2014580019	1	2	26	2	1	1	1	1	1	0	1	1	1	1	1	1	1	1	12	4	16	18	88.8889	78.3784	100	65	82.0901	10	10	10	10	10	10	10	10	80
3	1	2014580027	1	2	27	2	1	1	1	1	1	0	1	1	1	1	1	0	1	1	11	4	15	18	83.3	83.7838	82.3864	60	77.5448	10	10	10	9	10	10	10	10	79
3	4	2014580031	1	2	30	2	1	1	1	1	1	0	1	1	1	1	1	1	1	1	12	4	16	18	88.8889	78.3784	93.1818	65	80.7265	10	10	10	10	10	10	10	10	80
3	2	2012191020	2	1	26	2	2	1	1	1	1	0	0			1	1	1	1	0	8	4	12	16	75	78.3784	90.625	65	77.97	8	7	8	7	6	8	8	8	60
3	4	2012191073	2	2	31	2	1	1	1	1	1	0	1	1	1	1	1	1	1	1	12	4	16	18	88.8889	78.3784	86.0795	60	78.306	10	10	10	10	9	10	10	10	79
3	3	2011191057	2	1	29	2	2	1	1	1	1	0	0			1	1	0	0	0	6	3	9	16	56.3	72.973	84.0909	70	74.2053	9	9	9	9	9	9	9	9	72
3	2	2009133033	2	1	28	2	2	1	1	1	1	0	0			1	1	1	1	0	8	4	12	16	75	78.3784	95.4545	70	80.4359	10	9	9	7	8	9	9	8	69
3	3	2014580048	1	1	28	2	2	1	1	1	1	0	0			1	1	0	0	0	6	3	9	16	56.3	72.973	93.75	65	75.6371	10	10	10	10	8	8	8	10	74
4	3	2011191055	2	1	26	1	1	1	0	1	1	0	1	1	1	1	1	1	1	1	11	5	16	18	88.8889	84.2105	81.456	60	78.2561	6	7	5	7	9	6	7	8	55
4	2	2014580016	1	2	28	1	1	1	0	1	1	0	1	1	1	0	1	1	0	0	8	3	11	18	61.1	59.4595	85.3022	75	74.146	7	8	6	7	7	8	8	6	57
4	4	2014580017	1	2	26	1	2	1	0	1	1	0	0			1	1	1	1	0	7	5	12	16	75	81.5789	90.6593	65	78.3393	5	5	4	10	8	7	8	6	53
4	1	2012191057	2	1	25	1	2	1	1	1	1	0	1			0	1	1	1	1	9	2	11	16	68.8	86.8421	100	60	79.6146	10	10	10	10	10	10	10	10	80
4	2	2012191064	2	1	27	1	1	1	0	1	1	0	1	1	1	0	1	1	0	0	8	3	11	18	61.1	59.4595	80.7692	65	71.7394	8	7	5	8	8	8	7	7	58
4	4	2012191068	2	1	25	1	2	1	0	1	1	0	0			1	1	1	1	0	7	5	12	16	75	81.5789	96.4286	75	82	10	10	10	10	10	10	10	10	80
4	3	2012191071	2	1	24	1	1	1	0	1	1	0	1	1	1	1	1	1	1	1	11	5	16	18	88.8889	84.2105	96.4286	60	82.2506	8	3	8	10	8	8	10	10	65
4	1	2012191008	2	1	23	1	2	1	1	1	1	0	1			0	1	1	1	1	9	2	11	16	68.8	86.8421	94.2308	70	80.9607	6	7	5	5	8	9	4	6	50
4	3	2012191037	2	1	25	1	1	1	0	1	1	0	1	1	1	1	1	1	1	1	11	5	16	18	88.8889	84.2105	72.5275	60	76.4704	9	9	8	8	8	9	8	8	67
4	1	2014580037	1	2	27	1	2	1	1	1	1	0	1			0	1	1	1	1	9	2	11	16	68.8	86.8421	82.967	65	77.208	10	10	10	10	10	10	10	10	80
4	2	2014580047	1	1	26	1	1	1	0	1	1	0	1	1	1	0	1	1	0	0	8	3	11	18	61.1	59.4595	67.9945	60	66.6845	8	8	7	5	8	8	8	9	61
4	4	2012191023	2	1	25	1	2	1	0	1	1	0	0			1	1	1	1	0	7	5	12	16	75	81.5789	86.8132	75	82.0701	7	5	5	5	5	7	3	5	42
4	4	2012191067	2	1	25	1	2	1	0	1	1	0	0			1	1	1	1	0	7	5	12	16	75	81.5789	98.0769	60	79.3228	10	8	8	8	8	8	10	10	70
5	3	2014580011	1	1	28	1	1	1	1	0	1	0	1	1	1	0	1	1	0	0	8	3	11	18	61.1	60.5263	87.0833	70	73.6623	10	10	8	10	10	9	9	10	76
5	4	2011191040	2	2	28	1	1	1	1	1	1	0	1	0	1	0	1	1	0	0	8	3	11	18	61.1	67.5676	87.0833	70	73.7185	10	10	10	10	10	10	10	10	80
5	4	2014580012	1	2	25	1	1	1	1	1	1	0	1	0	1	0	1	1	0	0	8	3	11	18	61.1	67.5676	87.0833	80	77.2185	10	10	9	10	9	9	10	8	75
5	4	2014580013	1	1	29	1	1	1	1	1	1	0	1	0	1	0	1	1	0	0	8	3	11	18	61.1	67.5676	88.9583	75	75.5935	9	9	9	6	7	7	9	10	66
5	4	2011191050	2	1	26	1	1	1	1	1	1	0	1	0	1	0	1	1	0	0	8	3	11	18	61.1	67.5676	92.0833	85	79.2185	10	10	10	8	10	10	9	9	76
5	2	2014580018	1	1	26	1	1	1	1	1	1	0	1	0	1	0	1	0	0	0	7	3	10	18	55.6	65.7895	79.375	70	71.5768	10	10	9	10	9	9	9	10	76
5	1	2012191014	2	2	24	1	1	1	1	1	0	0	0	0	1	0	1	0	0	0	5	3	8	18	44.4	78.3784	91.6667	70	74.7568	7	7	5	7	7	7	5	5	50
5	1	2012191042	2	1	24	1	1	1	1	1	0	0	0	0	1	0	1	0	0	0	5	3	8	18	44.4	78.3784	96.6667	70	76.2568	5	5	6	5	5	6	5	5	42
5	3	2014580033	1	1	28	1	1	1	1	0	1	0	1	1	1	0	1	1	0	0	8	3	11	18	61.1	60.5263	88.9583	75	75.0373	9	9	9	9	9	9	9	9	72
5	1	2014580034	1	1	27	1	1	1	1	1	0	0	0	0	1	0	1	0	0	0	5	3	8	18	44.4	78.3784	100	80	78.4234	9	10	8	10	10	10	8	10	75
5	3	2014580039	1	2	29	1	1	1	1	0	1	0	1	1	1	0	1	1	0	0	8	3	11	18	61.1	60.5263	90.2083	75	75.7873	10	10	10	10	10	10	10	10	80
5	1	2014580045	1	2	29	1	1	1	1	1	0	0	0	0	1	0	1	0	0	0	5	3	8	18	44.4	78.3784	82.5	80	74.9234	10	10	10	10	10	10	10	10	80
5	2	2012191005	2	1	24	1	1	1	1	1	1	0	1	0	1	0	1	0	0	0	7	3	10	18	55.6	65.7895	95.2083	65	73.2434	10	10	10	10	10	10	10	10	80
5	2	2014580054	1	1	26	1	1	1	1	1	1	0	1	0	1	0	1	0	0	0	7	3	10	18	55.6	65.7895	80.625	80	74.3268	10	10	10	10	10	10	10	10	80
6	2	2012191046	2	2	24	2	2	0	1	1	1	1	0			1	0	1	0	0	6	3	9	16	56.3	62	88.6364	70	75.1773	8	8	8	8	8	8	8	8	64
6	2	2014580003	1	2	27	2	2	0	1	1	1	1	0			1	0	1	0	0	6	3	9	16	56.3	62	93.1818	75	77.0864	9	8	8	9	8	9	10	10	71
6	1	2012191006	2	1	25	2	1	1	1	1	1	1	1	1	1	1	0	0	1	0	10	4	14	18	77.8	84	81.8182	55	76.7636	9	9	9	9	9	10	10	10	75
6	1	2012191035	2	2	26	2	1	1	1	1	1	1	1	1	1	1	0	0	1	0	10	4	14	18	77.8	84	93.1818	60	80.0364	10	9	9	9	9	9	10	10	75
6	3	2012191048	2	1	25	2	1	0	1	1	0	1	1	1	1	0	0	1	1	0	8	3	11	18	61.1	63	100	65	77.75	8	5	7	7	7	8	7	7	56
6	1	2012551053	2	2	33	2	1	1	1	1	1	1	1	1	1	1	0	0	1	0	10	4	14	18	77.8	84	81.8182	75	80.7636	10	10	10	10	10	10	10	10	80
6	1	2014580021	1	2	28	2	1	1	1	1	1	1	1	1	1	1	0	0	1	0	10	4	14	18	77.8	84	88.6364	70	81.1273	8	7	8	8	7	6	10	8	62
6	3	2012191021	2	1	26	2	1	0	1	1	0	1	1	1	1	0	0	1	1	0	8	3	11	18	61.1	63	70.4545	55	69.3409	8	9	7	10	9	8	8	10	69
6	4	2012191043	2	2	24	2	2	0	1	1	1	1	1	1	0		0	1	0	0	7	3	10	16	62.5	70	63.6364	70	69.6273	10	10	10	10	10	10	10	10	80
6	3	2012191049	2	1	25	2	1	0	1	1	0	1	1	1	1	0	0	1	1	0	8	3	11	18	61.1	63	93.1818	60	75.8864	9	9	9	9	9	9	9	9	72
6	4	2012191032	2	1	26	2	2	0	1	1	1	1	1			1	0	1	0	0	7	3	10	16	62.5	70	100	60	75.4	9	10	8	10	9	10	9	9	74
6	2	2014580032	1	2	28	2	2	0	1	1	1	1	0			1	0	1	0	0	6	3	9	16	56.3	62	88.6364	65	74.1773	10	10	10	10	10	10	10	9	79
6	4	2014580038	1	2	28	2	2	0	1	1	1	1	1			1	0	1	0	0	7	3	10	16	62.5	70	86.3636	70	75.1727	10	10	10	10	10	10	10	10	80
6	4	2012191002	2	1	25	2	2	0	1	1	1	1	1			1	0	1	0	0	7	3	10	16	62.5	70	84.0909	70	74.2182	9	9	9	8	8	8	8	9	68
7	3	2014580004	1	2	26	2	2	1	1	1	1	0	1			1	1	1	0	0	8	4	12	16	75	78	84.375	60	75.975	8	8	8	8	7	8	8	8	63
7	1	2012191012	2	1	24	2	1	1	1	1	1	1	1	1	1	1	1	0	0	0	10	4	14	18	77.8	73	81.25	60	74.9	8	8	9	10	8	9	9	8	69
7	1	2014580009	1	1	27	2	1	1	1	1	1	1	1	1	1	1	1	0	0	0	10	4	14	18	77.8	73	78.125	60	74.275	9	9	8	8	8	8	8	7	65
7	4	2012191030	2	2	24	2	1	1	1	1	1	0	1	1	1	1	0	0	0	0	8	4	12	18	66.7	76	96.4286	60	78.2357	7	7	7	7	7	7	7	7	56
7	1	2012191027	2	2	25	2	1	1	1	1	1	1	1	1	1	1	1	0	0	0	10	4	14	18	77.8	73	100	60	79.15	8	9	9	9	8	9	9	9	70
7	2	2012191053	2	1	24	2	2	1	1	1	1	0	1			1	1	0	0	0	7	2	9	16	56.3	70	93.75	60	74.1	8	7	7	6	4	6	7	9	54
7	2	2011191025	2	1	25	2	2	1	1	1	1	0	1			1	1	0	0	0	7	2	9	16	56.3	70	93.3036	60	69.0107	9	9	8	10	8	7	9	9	69
7	4	2014580041	1	1	30	2	1	1	1	1	1	0	1	1	1	1	0	0	0	0	8	4	12	18	66.7	76	81.25	60	73.7	10	10	10	10	10	7	10	10	77
7	3	2014580043	1	1	27	2	2	1	1	1	1	0	1			1	1	1	0	0	8	4	12	16	75	78	81.25	60	75.35	8	9	9	10	9	8	9	8	70
7	3	2012191026	2	1	26	2	2	1	1	1	1	0	1			1	1	1	0	0	8	4	12	16	75	78	68.75	60	71.85	10	9	9	9	9	10	10	9	75
7	4	2014580051	1	2	26	2	1	1	1	1	1	0	1	1	1	1	0	0	0	0	8	4	12	18	66.7	76	83.9286	60	74.7357	10	10	10	10	10	10	10	10	80
7	1	2012191061	2	1	24	2	1	1	1	1	1	1	1	1	1	1	1	0	0	0	10	4	14	18	77.8	73	83.9286	60	75.9357	5	8	9	8	7	7	7	7	58
7	2	2012191076	2	2	31	2	2	1	1	1	1	0	1			1	1	0	0	0	7	2	9	16	56.3	70	90.1786	60	72.8857	8	8	7	9	9	8	9	9	67
7	3	2012191007	2	1	24	2	2	1	1	1	1	0	1			1	1	1	0	0	8	4	12	16	75	78	90.1786	60	77.1357	7	7	7	8	7	8	7	8	59
8	4	2012580006	1	1	32	1	2	1	1	1	1	0	0			0	1	1	1	0	7	4	11	16	68.8	50	93.3333	60	73.3167	8	8	8	5	9	8	7	8	61
8	1	2012191065	2	1	25	1	1	1	1	0	1	0	1	1	1	0	1	1	0	0	8	4	12	18	66.7	63	93.3333	60	74.6667	9	9	8	8	8	8	8	8	66
8	2	2012191017	2	1	26	1	2	1	1	1	1	0	0			0	1	0	0	0	5	3	8	16	50	66	91.6667	60	73.1833	8	6	8	6	8	8	7	5	56
8	3	2012191069	2	1	24	1	1	1	0	1	1	0	1	1	1	0	1	1	1	1	10	4	14	18	77.8	57	93.3333	65	75.9167	10	10	10	10	10	10	10	10	80
8	2	2012191019	2	2	25	1	2	1	1	1	1	0	0			0	1	0	0	0	5	3	8	16	50	66	93.3333	70	76.5167	10	10	9	10	10	10	10	10	79
8	4	2014580022	1	1	31	1	2	1	1	1	1	0	0			0	1	1	1	0	7	4	11	16	68.8	50	88.3333	65	74.3167	10	10	10	10	10	10	10	10	80
8	3	2011191034	2	1	25	1	1	1	0	1	1	0	1	1	1	0	1	1	1	1	10	4	14	18	77.8	57	88.7879	60	74.0076	7	7	5	7	8	7	7	7	55
8	1	2012191018	2	2	25	1	1	1	1	0	1	0	1	1	1	0	1	1	0	0	8	4	12	18	66.7	63	93.3333	70	75.6667	8	8	8	8	8	8	8	8	64
8	3	2014580030	1	1	26	1	1	1	0	1	1	0	1	1	1	0	1	1	1	1	10	4	14	18	77.8	57	88.3333	65	74.4167	10	10	10	10	10	10	10	10	80
8	4	2011580039	1	1	34	1	2	1	1	1	1	0	0			0	1	1	1	0	7	4	11	16	68.8	50	96.6667	70	75.4833	10	10	10	10	5	10	10	10	75
8	2	2012191016	2	1	25	1	2	1	1	1	1	0	0			0	1	0	0	0	5	3	8	16	50	66	93.3333	65	74.5167	10	10	10	10	10	10	10	10	80
8	1	2012191001	2	1	25	1	1	1	0	1	0	1	1	1	0	1	1	0	0	1	8	4	12	18	66.7	63	90	65	74	8	9	8	7	8	8	8	9	65
9	2	2014580007	1	1	27	2	1	1	1	1	0	1	1			1	1	1	0	1	9	3	12	16	75	84	91.6084	70	80.0717	7	7	8	7	7	7	7	7	57
9	1	2012191056	2	1	25	2	1	1	1	1	0	1	1			1	1	1	1	1	10	4	14	16	87.5	68	86.5385	70	78.7077	7	8	8	8	8	8	8	8	63
9	1	2012191036	2	1	24	2	1	1	1	1	0	1	1			1	1	1	1	1	10	4	14	16	87.5	68	86.5385	70	78.7077	9	9	9	10	10	10	9	10	76
9	4	2012191004	2	1	25	2	1	1	1	1	0	0	1			1	0	1	0	1	7	3	10	16	62.5	81	79.7203	70	76.3441	9	10	9	9	9	9	10	10	75
9	3	2014580025	1	2	27	2	1	0	1	1	0	1	1	1	1	1	0	1	1	1	10	3	13	18	72.2	74	75.1748	70	75.435	8	9	8	9	9	10	10	10	73
9	1	2012191070	2	1	25	2	1	1	1	1	0	1	1			1	1	1	1	1	10	4	14	16	87.5	68	85.8392	80	80.5678	8	8	8	8	8	8	8	8	64
9	3	2014580035	1	2	25	2	1	0	1	1	0	1	1	1	1	1	0	1	1	1	10	3	13	18	72.2	74	89.3357	80	79.7671	8	5	7	9	9	10	7	8	63
9	4	2014580040	1	1	26	2	1	1	1	1	0	0	1			1	0	1	0	1	7	3	10	16	62.5	81	81.993	80	77.2986	8	9	8	8	8	9	8	8	66
9	1	2014580042	1	1	28	2	1	1	1	1	0	1	1			1	1	1	1	1	10	4	14	16	87.5	68	90.3846	70	79.4769	10	10	9	10	10	10	9	10	78
9	4	2012191013	2	2	27	2	1	1	1	1	0	0	1			1	0	1	0	1	7	3	10	16	62.5	81	76.2238	70	75.1448	8	8	8	9	9	9	8	8	67
9	2	2011191018	2	1	26	2	1	1	1	1	0	1	1			0	1	1	1	0	8	3	11	16	68.8	84	90.3846	70	79.3269	7	6	6	7	8	8	8	7	57
9	3	2014580049	1	2	25	2	1	0	1	1	0	1	1	1	1	1	0	1	1	1	10	3	13	18	72.2	74	96.1538	70	79.6308	9	9	10	10	9	10	10	10	77
9	2	2012191028	2	1	26	2	1	1	1	1	0	1	1			0	1	1	1	0	8	3	11	16	68.8	84	86.5385	75	79.5577	8	8	8	8	7	8	8	8	63
